# Supplementary material
Source: MDPI journal article supplement (https://www.mdpi.com/search?q=marinedrugs-15-00278)
Supplement: s001 [file marinedrugs-15-00278-s001.pdf]

Supporting Information for

HPLC-HRMS Quantification of the  
Ichthyotoxin Karmitoxin from *Karlodinium*  
*armiger*

*Aaron John Christian Andersen,<sup>1,2</sup> Livia Soman de Medeiros,<sup>3</sup> Sofie Bjørnholt Binzer,<sup>4</sup>  
Silas Anselm Rasmussen,<sup>2</sup> Per Juel Hansen,<sup>4</sup> Kristian Fog Nielsen,<sup>2</sup> Kevin Jørgensen,<sup>1</sup> and  
Thomas Ostfeld Larsen<sup>2</sup>*

[1] National Food Institute, Technical University of Denmark, Kemitorvet Building 202, 2800 Lyngby, Denmark

[2] Department of Biotechnology and Biomedicine, Technical University of Denmark, Building 221, 2800 Lyngby, Denmark

[3] Departamento de Química, Universidade Federal de São Paulo (UNIFESP), Rua São Nicolau, 210, CEP 09913-030, Diadema-SP, Brazil

[4] Marine Biological Section, Department of Biology, University of Copenhagen, Strandpromenaden 5, 3000 Helsingør, Denmark

*Correspondence to: Thomas Ostfeld Larsen (tol@bio.dtu.dk)*

## Table of Contents

|                                                                                        |    |
|----------------------------------------------------------------------------------------|----|
| Figure S1: <i>Calibration curve of karmitoxin in methanol</i> .....                    | 2  |
| Figure S2: <i>Relationship between karmitoxin and phototrophic cell density</i> .....  | 3  |
| Figure S3: <i>Relationship between karmitoxin and mixotrophic cell density</i> .....   | 4  |
| Figure S4: <i>Calibration curve of fumonisin B<sub>1</sub></i> .....                   | 5  |
| Figure S5: <i>Calibration curve of fumonisin B<sub>2</sub></i> .....                   | 6  |
| Figure S6: <i>Strata-X prepared sample with Bruker QTOF analysis</i> .....             | 7  |
| Table S1: <i>Details of the amphidinol-like metabolites from dinoflagellates</i> ..... | 10 |
| Table S2: <i>Concentration of karmitoxin per cell</i> .....                            | 11 |
| References for Supporting Information .....                                            | 12 |

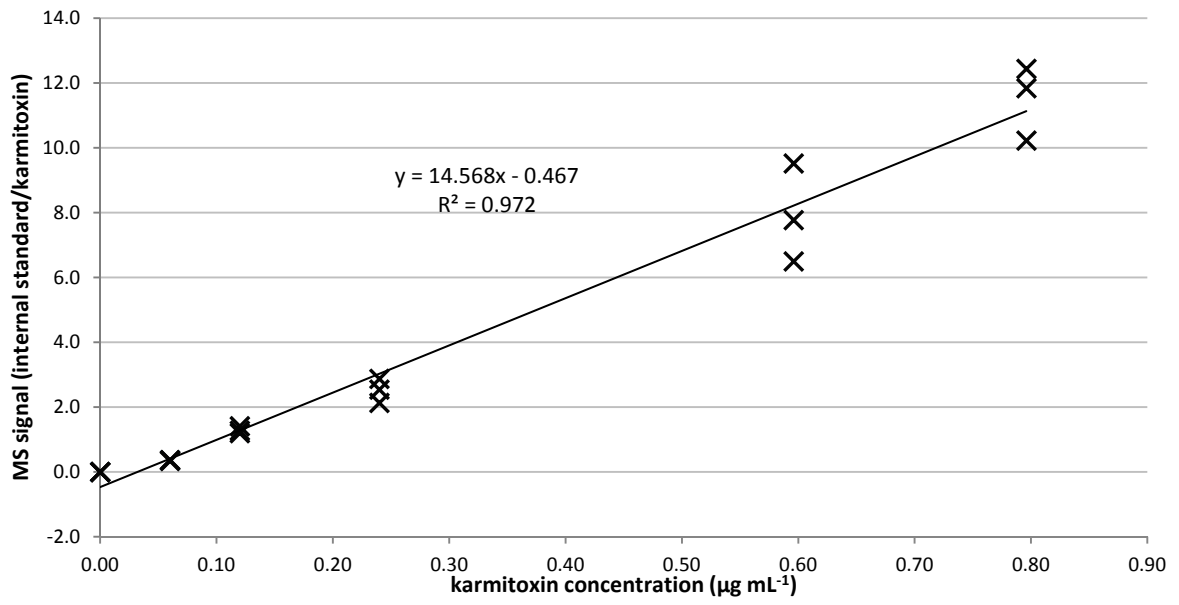

**Figure S1:** *Calibration curve of karmitoxin in methanol*

Calibration curve used for the quantification of karmitoxin in experimental cultures

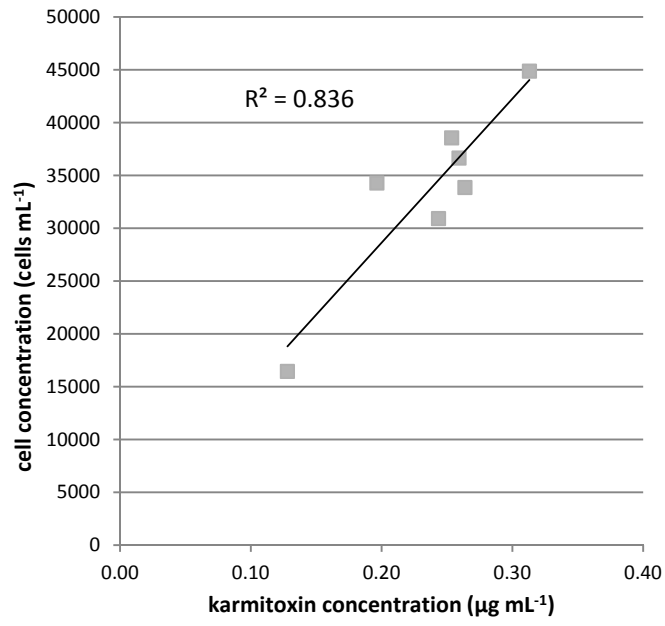

**Figure S2:** Relationship between karmitoxin and phototrophic cell density

Karmitoxin concentration compared to cell concentration in cultures grown in ammonium substituted f/2 media.

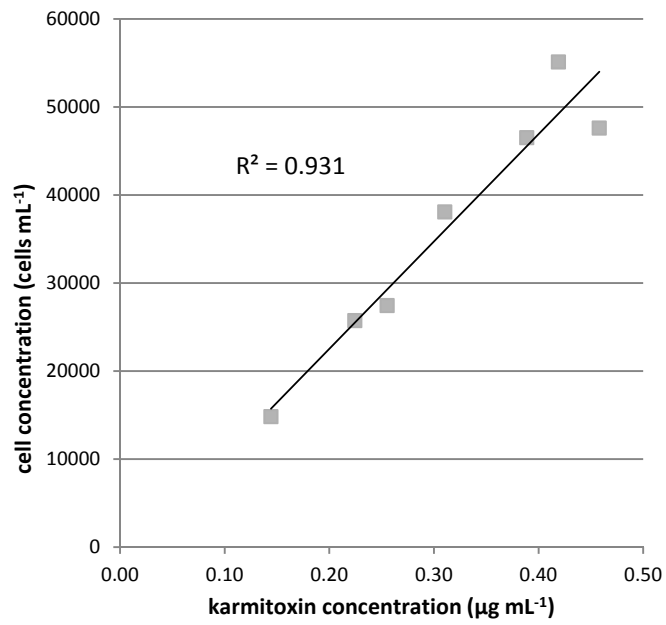

**Figure S3:** Relationship between karmitoxin and mixotrophic cell density

Karmitoxin concentration compared to cell count in cultures grown in f/2 media and fed *Rhodomonas salina*.

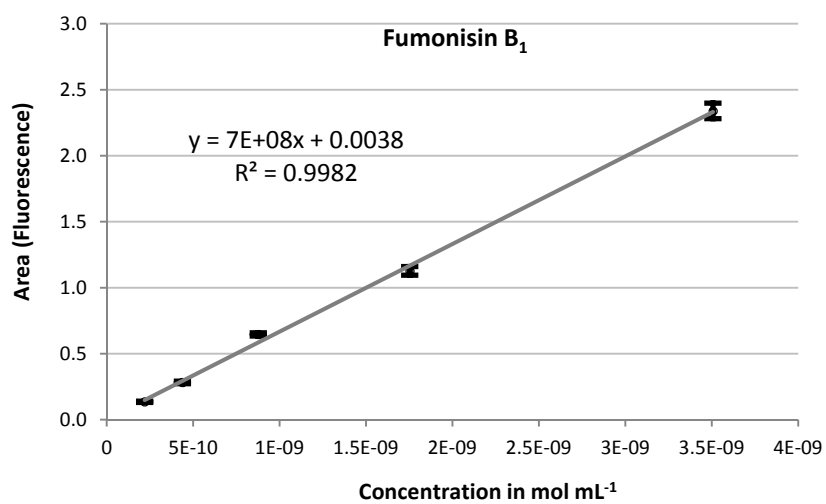

**Figure S4:** Calibration curve of fumonisin B<sub>1</sub>

Calibration curves used for the quantification of karmitoxin standard.

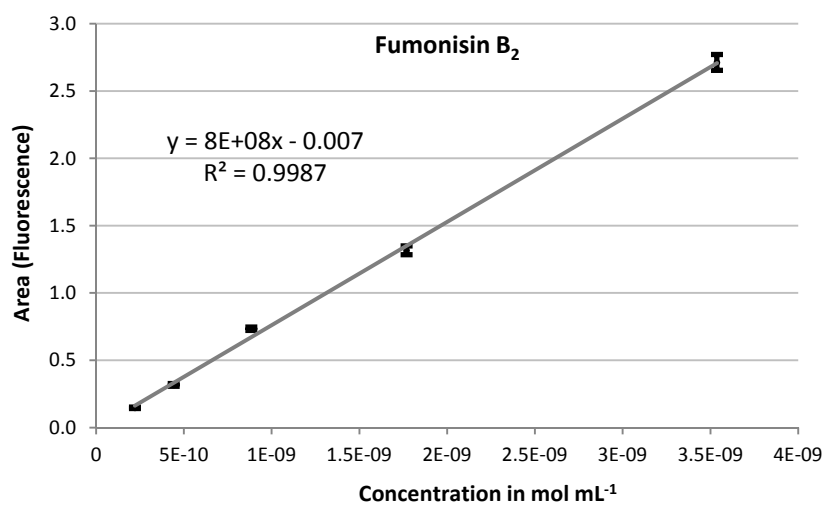

**Figure S5:** Calibration curve of fumonisin B<sub>2</sub>

Calibration curves used for the quantification of karmitoxin standard.

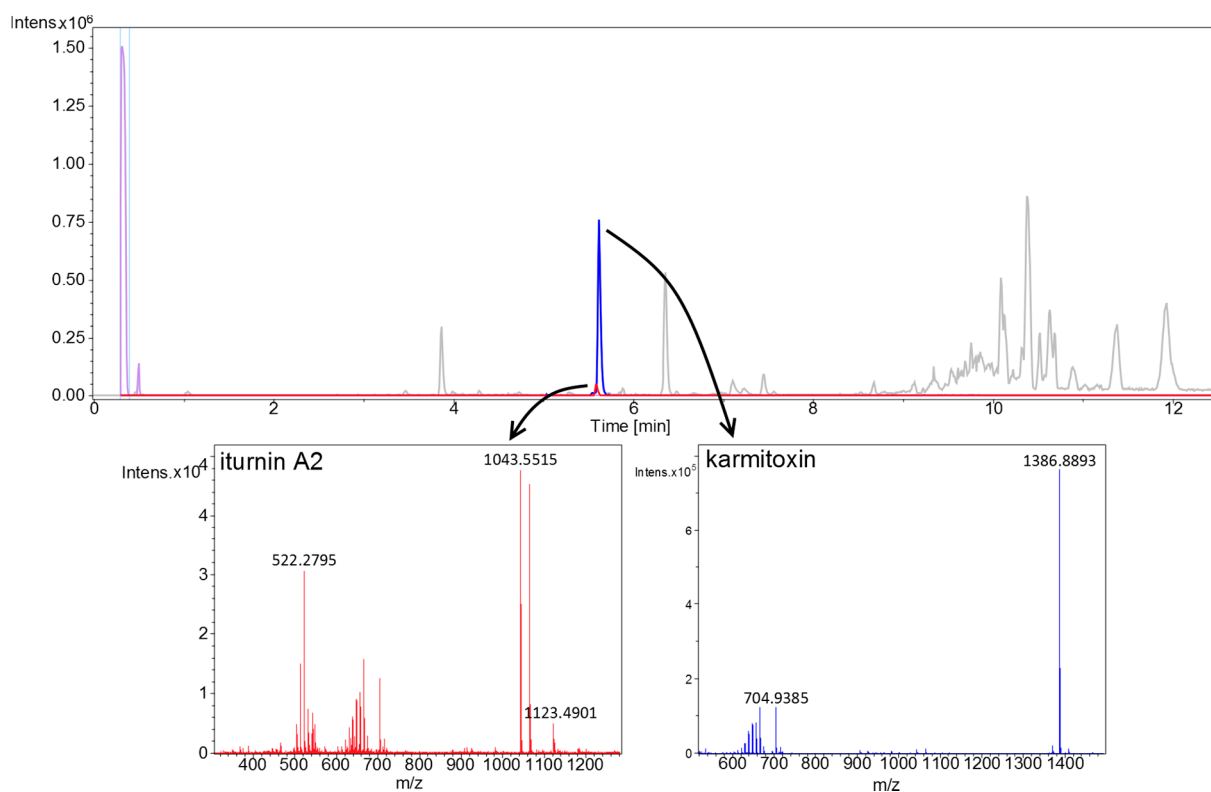

**Figure S6:** *Strata-X* prepared sample with Bruker QTOF analysis

This figure illustrates an example base peak chromatogram (grey line) of a *Strata-X* SPE prepared sample of *K. armiger* with an internal standard iturin A2 (indicated by the red extracted ion chromatogram). The blue extracted ion chromatogram indicates the  $[M+H]^+$  ion of karmitoxin, and the purple extracted ion chromatogram indicates the internal calibrant.



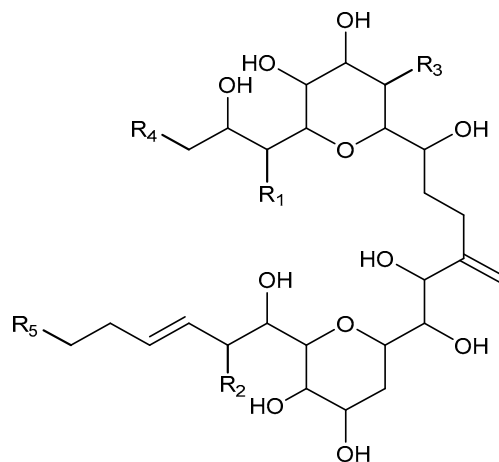

| Name          | Molecular Formula                                    | Monoisotopic Mass | Source                                               | R <sub>1</sub> | R <sub>2</sub> | R <sub>3</sub> | R <sub>4</sub> (polar arm)                        |                 |        | R <sub>5</sub> (non-polar arm)                   |                 |        | Reference              |
|---------------|------------------------------------------------------|-------------------|------------------------------------------------------|----------------|----------------|----------------|---------------------------------------------------|-----------------|--------|--------------------------------------------------|-----------------|--------|------------------------|
|               |                                                      |                   |                                                      |                |                |                | Formula                                           | backbone        | methyl | Formula                                          | backbone        | triene |                        |
| Karlotoxin 9  | C <sub>65</sub> H <sub>117</sub> ClO <sub>24</sub>   | 1316.7623         | <i>Karlodinium sp.</i>                               | H              | OH             | OH             | C <sub>34</sub> H <sub>67</sub> O <sub>12</sub>   | C <sub>31</sub> | 3      | C <sub>14</sub> H <sub>22</sub> ClO <sub>2</sub> | C <sub>14</sub> | No     | (Waters et al. 2015)   |
| Karlotoxin 8  | C <sub>65</sub> H <sub>117</sub> ClO <sub>24</sub>   | 1316.7623         | <i>Karlodinium sp.</i>                               | H              | OH             | OH             | C <sub>34</sub> H <sub>67</sub> O <sub>12</sub>   | C <sub>31</sub> | 3      | C <sub>16</sub> H <sub>26</sub> ClO <sub>2</sub> | C <sub>16</sub> | No     | (Waters et al. 2015)   |
| Symbiopolyol  | C <sub>60</sub> H <sub>100</sub> NaO <sub>23</sub> S | 1243.6274         | <i>Amphidinium sp.</i>                               | OH             | OH             | H              | C <sub>27</sub> H <sub>49</sub> O <sub>12</sub> S | C <sub>25</sub> | 2      | C <sub>16</sub> H <sub>23</sub> O <sub>2</sub>   | C <sub>16</sub> | Yes    | (Hanif et al. 2010)    |
| Amphidinol 17 | C <sub>63</sub> H <sub>110</sub> O <sub>24</sub> S   | 1282.7108         | <i>Amphidinium carterae</i>                          | OH             | OH             | H              | C <sub>30</sub> H <sub>59</sub> O <sub>13</sub> S | C <sub>27</sub> | 3      | C <sub>16</sub> H <sub>23</sub> O <sub>2</sub>   | C <sub>16</sub> | Yes    | (Meng et al. 2010)     |
| Amphidinol 11 | C <sub>71</sub> H <sub>122</sub> NaO <sub>28</sub> S | 1477.7741         | <i>Amphidinium carterae</i>                          | OH             | OH             | H              | C <sub>38</sub> H <sub>71</sub> O <sub>17</sub> S | C <sub>33</sub> | 5      | C <sub>16</sub> H <sub>23</sub> O <sub>2</sub>   | C <sub>16</sub> | Yes    | (Echigoya et al. 2005) |
| Lingshuiol B  | C <sub>60</sub> H <sub>100</sub> NaO <sub>23</sub> S | 1243.6274         | <i>Amphidinium sp.</i>                               | OH             | OH             | H              | C <sub>27</sub> H <sub>49</sub> O <sub>12</sub> S | C <sub>25</sub> | 2      | C <sub>16</sub> H <sub>23</sub> O <sub>2</sub>   | C <sub>16</sub> | Yes    | (Huang et al. 2004)    |
| Carteraol E   | C <sub>74</sub> H <sub>126</sub> O <sub>24</sub>     | 1398.8639         | <i>Amphidinium carterae</i>                          | OH             | OH             | H              | C <sub>41</sub> H <sub>75</sub> O <sub>13</sub>   | C <sub>37</sub> | 4      | C <sub>16</sub> H <sub>23</sub> O <sub>2</sub>   | C <sub>16</sub> | Yes    | (Huang et al. 2009)    |
| Amphidinol 7  | C <sub>59</sub> H <sub>100</sub> O <sub>23</sub> S   | 1208.6376         | <i>Amphidinium klebsii</i>                           | OH             | OH             | H              | C <sub>26</sub> H <sub>49</sub> O <sub>12</sub> S | C <sub>23</sub> | 3      | C <sub>16</sub> H <sub>23</sub> O <sub>2</sub>   | C <sub>16</sub> | Yes    | (Morsy et al. 2005)    |
| Amphidinol 12 | C <sub>68</sub> H <sub>116</sub> O <sub>26</sub> S   | 1380.7476         | <i>Amphidinium carterae</i>                          | OH             | OH             | H              | C <sub>35</sub> H <sub>65</sub> O <sub>15</sub> S | C <sub>33</sub> | 2      | C <sub>16</sub> H <sub>23</sub> O <sub>2</sub>   | C <sub>16</sub> | Yes    | (Echigoya et al. 2005) |
| Amphidinol 2  | C <sub>71</sub> H <sub>122</sub> O <sub>25</sub>     | 1374.8275         | <i>Amphidinium klebsii</i>                           | OH             | OH             | H              | C <sub>38</sub> H <sub>71</sub> O <sub>14</sub>   | C <sub>33</sub> | 5      | C <sub>16</sub> H <sub>23</sub> O <sub>2</sub>   | C <sub>16</sub> | Yes    | (Paul et al. 1995)     |
| Amphidinol 4  | C <sub>68</sub> H <sub>116</sub> O <sub>23</sub>     | 1300.7907         | <i>Amphidinium carterae</i><br>and <i>A. klebsii</i> | OH             | OH             | H              | C <sub>35</sub> H <sub>65</sub> O <sub>12</sub>   | C <sub>33</sub> | 2      | C <sub>16</sub> H <sub>23</sub> O <sub>2</sub>   | C <sub>16</sub> | Yes    | (Houdai et al. 2001)   |

| Name                              | Molecular Formula                                     | Monoisotopic Mass | Source                       | R <sub>1</sub> | R <sub>2</sub> | R <sub>3</sub> | R <sub>4</sub> (polar arm)                         |                 |        | R <sub>5</sub> (non-polar arm)                   |                 |        | Reference                 |
|-----------------------------------|-------------------------------------------------------|-------------------|------------------------------|----------------|----------------|----------------|----------------------------------------------------|-----------------|--------|--------------------------------------------------|-----------------|--------|---------------------------|
|                                   |                                                       |                   |                              |                |                |                | Formula                                            | backbone        | methyl | Formula                                          | backbone        | triene |                           |
| Amphidinol 6                      | C <sub>70</sub> H <sub>120</sub> O <sub>24</sub>      | 1344.8170         | <i>Amphidinium klebsii</i>   | OH             | OH             | H              | C <sub>37</sub> H <sub>69</sub> O <sub>13</sub>    | C <sub>35</sub> | 2      | C <sub>16</sub> H <sub>23</sub> O <sub>2</sub>   | C <sub>16</sub> | Yes    | (Paul et al. 1997)        |
| Amphidinol 10                     | C <sub>66</sub> H <sub>112</sub> O <sub>23</sub>      | 1272.7594         | <i>Amphidinium spp.</i>      | OH             | OH             | H              | C <sub>33</sub> H <sub>61</sub> O <sub>12</sub>    | C <sub>31</sub> | 2      | C <sub>16</sub> H <sub>23</sub> O <sub>2</sub>   | C <sub>16</sub> | Yes    | (Echigoya et al. 2005)    |
| Lingshuiol A                      | C <sub>66</sub> H <sub>112</sub> O <sub>23</sub>      | 1272.7594         | <i>Amphidinium sp.</i>       | OH             | OH             | H              | C <sub>33</sub> H <sub>61</sub> O <sub>12</sub>    | C <sub>31</sub> | 2      | C <sub>16</sub> H <sub>23</sub> O <sub>2</sub>   | C <sub>16</sub> | Yes    | (Huang et al. 2004)       |
| Amdigenol G                       | C <sub>60</sub> H <sub>102</sub> NaO <sub>25</sub> S  | 1277.6329         | <i>Amphidinium sp.</i>       | OH             | OH             | H              | C <sub>27</sub> H <sub>49</sub> O <sub>12</sub> S  | C <sub>25</sub> | 2      | C <sub>16</sub> H <sub>25</sub> O <sub>4</sub>   | C <sub>16</sub> | No     | (Inuzuka et al. 2014)     |
| Amdigenol A                       | C <sub>104</sub> H <sub>178</sub> NaO <sub>43</sub> S | 2170.1360         | <i>Amphidinium sp.</i>       | OH             | OH             | H              | C <sub>71</sub> H <sub>125</sub> O <sub>30</sub> S | C <sub>66</sub> | 5      | C <sub>16</sub> H <sub>25</sub> O <sub>4</sub>   | C <sub>16</sub> | No     | (Inuzuka et al. 2012)     |
| Amphidinol 14                     | C <sub>59</sub> H <sub>102</sub> NaO <sub>25</sub> S  | 1265.6329         | <i>Amphidinium klebsii</i>   | OH             | OH             | H              | C <sub>26</sub> H <sub>49</sub> O <sub>12</sub> S  | C <sub>23</sub> | 3      | C <sub>16</sub> H <sub>25</sub> O <sub>4</sub>   | C <sub>16</sub> | Yes    | (Morsy et al. 2006)       |
| Luteophanol A                     | C <sub>60</sub> H <sub>102</sub> O <sub>25</sub> S    | 1254.6431         | <i>Amphidinium sp.</i>       | OH             | H              | H              | C <sub>27</sub> H <sub>49</sub> O <sub>12</sub> S  | C <sub>25</sub> | 2      | C <sub>16</sub> H <sub>25</sub> O <sub>4</sub>   | C <sub>16</sub> | No     | (Doi et al. 1997)         |
| Luteophanol D                     | C <sub>67</sub> H <sub>116</sub> O <sub>25</sub>      | 1320.7806         | <i>Amphidinium sp.</i>       | OH             | OH             | H              | C <sub>34</sub> H <sub>63</sub> O <sub>12</sub>    | C <sub>32</sub> | 2      | C <sub>16</sub> H <sub>25</sub> O <sub>4</sub>   | C <sub>16</sub> | No     | (Kubota et al. 2005)      |
| Amphidinol 15                     | C <sub>59</sub> H <sub>102</sub> O <sub>22</sub>      | 1162.6863         | <i>Amphidinium klebsii</i>   | OH             | OH             | H              | C <sub>26</sub> H <sub>49</sub> O <sub>9</sub>     | C <sub>23</sub> | 3      | C <sub>16</sub> H <sub>25</sub> O <sub>4</sub>   | C <sub>16</sub> | Yes    | (Morsy et al. 2006)       |
| Karlotoxin 2                      | C <sub>67</sub> H <sub>121</sub> ClO <sub>24</sub>    | 1344.7936         | <i>Karlodinium veneficum</i> | H              | OH             | OH             | C <sub>34</sub> H <sub>67</sub> O <sub>12</sub>    | C <sub>31</sub> | 3      | C <sub>16</sub> H <sub>26</sub> ClO <sub>2</sub> | C <sub>16</sub> | No     | (Peng et al. 2010)        |
| 4,5-dihydro-karlotoxin 2          | C <sub>67</sub> H <sub>123</sub> ClO <sub>24</sub>    | 1346.8093         | <i>Karlodinium veneficum</i> | H              | OH             | OH             | C <sub>34</sub> H <sub>69</sub> O <sub>12</sub>    | C <sub>31</sub> | 3      | C <sub>16</sub> H <sub>26</sub> ClO <sub>2</sub> | C <sub>16</sub> | No     | (Cai et al. 2016)         |
| 4,5-dihydro-dechloro-karlotoxin 2 | C <sub>67</sub> H <sub>124</sub> O <sub>24</sub>      | 1312.8483         | <i>Karlodinium veneficum</i> | H              | OH             | OH             | C <sub>34</sub> H <sub>69</sub> O <sub>12</sub>    | C <sub>31</sub> | 3      | C <sub>16</sub> H <sub>27</sub> O <sub>2</sub>   | C <sub>16</sub> | No     | (Cai et al. 2016)         |
| Karatungiol B                     | C <sub>73</sub> H <sub>130</sub> O <sub>27</sub>      | 1438.8799         | <i>Amphidinium sp.</i>       | OH             | OH             | OH             | C <sub>40</sub> H <sub>73</sub> O <sub>15</sub>    | C <sub>37</sub> | 3      | C <sub>16</sub> H <sub>29</sub> O <sub>2</sub>   | C <sub>16</sub> | No     | (Washida et al. 2006)     |
| Lingshuiol                        | C <sub>69</sub> H <sub>122</sub> O <sub>25</sub>      | 1350.8275         | <i>Amphidinium sp.</i>       | OH             | OH             | H              | C <sub>36</sub> H <sub>65</sub> O <sub>14</sub>    | C <sub>33</sub> | 3      | C <sub>16</sub> H <sub>29</sub> O <sub>2</sub>   | C <sub>16</sub> | No     | (Huang et al. 2004)       |
| Karatungiol A                     | C <sub>73</sub> H <sub>132</sub> O <sub>28</sub>      | 1456.8905         | <i>Amphidinium sp.</i>       | OH             | OH             | OH             | C <sub>40</sub> H <sub>75</sub> O <sub>16</sub>    | C <sub>37</sub> | 3      | C <sub>16</sub> H <sub>29</sub> O <sub>2</sub>   | C <sub>16</sub> | No     | (Washida et al. 2006)     |
| Luteophanol C                     | C <sub>67</sub> H <sub>116</sub> O <sub>25</sub>      | 1320.7806         | <i>Amphidinium sp.</i>       | OH             | OH             | H              | C <sub>33</sub> H <sub>61</sub> O <sub>12</sub>    | C <sub>31</sub> | 2      | C <sub>17</sub> H <sub>27</sub> O <sub>4</sub>   | C <sub>17</sub> | No     | (Kubota et al. 1998)      |
| Luteophanol B                     | C <sub>67</sub> H <sub>116</sub> O <sub>25</sub>      | 1320.7806         | <i>Amphidinium sp.</i>       | OH             | OH             | H              | C <sub>33</sub> H <sub>61</sub> O <sub>12</sub>    | C <sub>31</sub> | 2      | C <sub>17</sub> H <sub>27</sub> O <sub>4</sub>   | C <sub>17</sub> | No     | (Kubota et al. 1998)      |
| 64E-Chlorokarlotoxin 3            | C <sub>68</sub> H <sub>123</sub> ClO <sub>24</sub>    | 1358.8093         | <i>Karlodinium veneficum</i> | H              | OH             | OH             | C <sub>34</sub> H <sub>67</sub> O <sub>12</sub>    | C <sub>31</sub> | 3      | C <sub>17</sub> H <sub>28</sub> ClO <sub>2</sub> | C <sub>17</sub> | No     | (Van Wagoner et al. 2010) |
| 10-O-Sulfokarlotoxin 3            | C <sub>68</sub> H <sub>124</sub> O <sub>27</sub> S    | 1404.8051         | <i>Karlodinium veneficum</i> | H              | OH             | OH             | C <sub>34</sub> H <sub>67</sub> O <sub>15</sub> S  | C <sub>31</sub> | 3      | C <sub>17</sub> H <sub>29</sub> O <sub>2</sub>   | C <sub>17</sub> | No     | (Van Wagoner et al. 2010) |
| Karlotoxin 3                      | C <sub>68</sub> H <sub>124</sub> O <sub>24</sub>      | 1324.8483         | <i>Karlodinium veneficum</i> | H              | OH             | OH             | C <sub>34</sub> H <sub>67</sub> O <sub>12</sub>    | C <sub>31</sub> | 3      | C <sub>17</sub> H <sub>29</sub> O <sub>2</sub>   | C <sub>17</sub> | No     | (Van Wagoner et al. 2010) |

| Name                      | Molecular Formula                                               | Monoisotopic Mass | Source                            | R <sub>1</sub> | R <sub>2</sub> | R <sub>3</sub> | R <sub>4</sub> (polar arm)                                     |                                |        | R <sub>5</sub> (non-polar arm)                   |                 |        | Reference                 |
|---------------------------|-----------------------------------------------------------------|-------------------|-----------------------------------|----------------|----------------|----------------|----------------------------------------------------------------|--------------------------------|--------|--------------------------------------------------|-----------------|--------|---------------------------|
|                           |                                                                 |                   |                                   |                |                |                | Formula                                                        | backbone                       | methyl | Formula                                          | backbone        | triene |                           |
| Amphidinol 19             | C <sub>71</sub> H <sub>122</sub> NaO <sub>27</sub> S            | 1461.7792         | <i>Amphidinium carterae</i>       | OH             | OH             | H              | C <sub>36</sub> H <sub>69</sub> O <sub>16</sub> S              | C <sub>33</sub>                | 3      | C <sub>18</sub> H <sub>25</sub> O <sub>2</sub>   | C <sub>18</sub> | Yes    | (Nuzzo et al. 2014)       |
| Amphidinol 13             | C <sub>70</sub> H <sub>118</sub> NaO <sub>26</sub> S            | 1429.7530         | <i>Amphidinium carterae</i>       | OH             | OH             | H              | C <sub>35</sub> H <sub>65</sub> O <sub>15</sub> S              | C <sub>33</sub>                | 2      | C <sub>18</sub> H <sub>25</sub> O <sub>2</sub>   | C <sub>18</sub> | Yes    | (Echigoya et al. 2005)    |
| Amphidinol (Amphidinol 1) | C <sub>73</sub> H <sub>126</sub> O <sub>27</sub> S              | 1466.8207         | <i>Amphidinium klebsii</i>        | OH             | OH             | H              | C <sub>38</sub> H <sub>73</sub> O <sub>16</sub> S              | C <sub>35</sub>                | 3      | C <sub>18</sub> H <sub>25</sub> O <sub>2</sub>   | C <sub>18</sub> | Yes    | (Satake et al. 1991)      |
| Amphidinol 18             | C <sub>71</sub> H <sub>122</sub> O <sub>24</sub>                | 1358.8326         | <i>Amphidinium carterae</i>       | OH             | OH             | H              | C <sub>36</sub> H <sub>69</sub> O <sub>13</sub>                | C <sub>33</sub>                | 3      | C <sub>18</sub> H <sub>25</sub> O <sub>2</sub>   | C <sub>18</sub> | Yes    | (Nuzzo et al. 2014)       |
| Amphidinol 9              | C <sub>70</sub> H <sub>118</sub> O <sub>23</sub>                | 1326.8064         | <i>Amphidinium carterae</i>       | OH             | OH             | H              | C <sub>35</sub> H <sub>65</sub> O <sub>12</sub>                | C <sub>33</sub>                | 2      | C <sub>18</sub> H <sub>25</sub> O <sub>2</sub>   | C <sub>18</sub> | Yes    | (Echigoya et al. 2005)    |
| Amphidinol 5              | C <sub>72</sub> H <sub>122</sub> O <sub>24</sub>                | 1370.8326         | <i>Amphidinium klebsii</i>        | OH             | OH             | H              | C <sub>37</sub> H <sub>69</sub> O <sub>13</sub>                | C <sub>35</sub>                | 2      | C <sub>18</sub> H <sub>25</sub> O <sub>2</sub>   | C <sub>18</sub> | Yes    | (Paul, et al. 1997)       |
| Amphidinol 3              | C <sub>70</sub> H <sub>118</sub> O <sub>23</sub>                | 1326.8064         | <i>Amphidinium klebsii</i>        | OH             | OH             | H              | C <sub>35</sub> H <sub>65</sub> O <sub>12</sub>                | C <sub>33</sub>                | 2      | C <sub>18</sub> H <sub>25</sub> O <sub>2</sub>   | C <sub>18</sub> | Yes    | (Murata et al. 2010)      |
| 65E-Chlorokarlotoxin 1    | C <sub>69</sub> H <sub>125</sub> ClO <sub>24</sub>              | 1372.8249         | <i>Karlodinium veneficum</i>      | H              | OH             | OH             | C <sub>34</sub> H <sub>67</sub> O <sub>12</sub>                | C <sub>31</sub>                | 3      | C <sub>18</sub> H <sub>30</sub> ClO <sub>2</sub> | C <sub>18</sub> | No     | (Van Wagoner et al. 2010) |
| karmitoxin                | C <sub>73</sub> H <sub>127</sub> NO <sub>23</sub>               | 1385.8799         | <i>Karlodinium armiger</i>        | H              | OH             | OH             | C <sub>38</sub> H <sub>68</sub> NO <sub>11</sub>               | C <sub>36</sub> N              | 2      | C <sub>18</sub> H <sub>31</sub> O <sub>2</sub>   | C <sub>18</sub> | No     | (Rasmussen et al. 2017)   |
| 10-O-Sulfokarlotoxin 1    | C <sub>69</sub> H <sub>126</sub> O <sub>27</sub> S              | 1418.8207         | <i>Karlodinium veneficum</i>      | H              | OH             | OH             | C <sub>34</sub> H <sub>67</sub> O <sub>15</sub> S              | C <sub>31</sub>                | 3      | C <sub>18</sub> H <sub>31</sub> O <sub>2</sub>   | C <sub>18</sub> | No     | (Van Wagoner et al. 2010) |
| Karlotoxin 1              | C <sub>69</sub> H <sub>126</sub> O <sub>24</sub>                | 1338.8639         | <i>Karlodinium veneficum</i>      | H              | OH             | OH             | C <sub>34</sub> H <sub>67</sub> O <sub>12</sub>                | C <sub>31</sub>                | 3      | C <sub>18</sub> H <sub>31</sub> O <sub>2</sub>   | C <sub>18</sub> | No     | (Van Wagoner et al. 2008) |
| Ostreol A                 | C <sub>67</sub> H <sub>112</sub> N <sub>2</sub> O <sub>23</sub> | 1312.7656         | <i>Ostreopsis cf. ovata</i>       | OH             | OH             | H              | C <sub>36</sub> H <sub>61</sub> N <sub>2</sub> O <sub>12</sub> | C <sub>34</sub> N <sub>2</sub> | 2      | C <sub>14</sub> H <sub>23</sub> O <sub>2</sub>   | C <sub>14</sub> | No     | (Hwang et al. 2013)       |
| 2-desulfo-amphidinol 7    | C <sub>59</sub> H <sub>100</sub> O <sub>20</sub>                | 1128.6808         | <i>Amphidinium klebsii</i>        | OH             | OH             | H              | C <sub>26</sub> H <sub>49</sub> O <sub>9</sub>                 | C <sub>23</sub>                | 3      | C <sub>16</sub> H <sub>23</sub> O <sub>2</sub>   | C <sub>16</sub> | Yes    | (Morsy et al. 2006)       |
| Amdigenol E*              | C <sub>82</sub> H <sub>138</sub> NaO <sub>37</sub> S            | 1769.8535         | <i>Amphidinium sp.</i>            | NA             | NA             | NA             | NA                                                             | NA                             | -      | C <sub>16</sub> H <sub>25</sub> O <sub>4</sub>   | C <sub>16</sub> | No     | (Inuzuka et al. 2014)     |
| Prorocentrol*             | C <sub>68</sub> H <sub>114</sub> O <sub>34</sub>                | 1474.7192         | <i>Prorocentrum hoffmannianum</i> | NA             | NA             | NA             | C <sub>31</sub> H <sub>57</sub> O <sub>17</sub>                | C <sub>28</sub>                | 3      | C <sub>22</sub> H <sub>33</sub> O <sub>6</sub>   | C <sub>22</sub> | Yes    | (Sugahara et al. 2011)    |

**Table S1:** Details of the amphidinol-like metabolites from dinoflagellates

Details of the amphidinol-like metabolites from dinoflagellates, and compounds (2-desulfo-amphidinol 7) and metabolites (amdigenol E, prorocentrol) closely related to these. \* = these metabolites do not share the common core structure, but do have structural similarities.

| pg cell <sup>-1</sup> |                              |
|-----------------------|------------------------------|
| Fed                   | NH <sub>4</sub> <sup>+</sup> |
| 9.36                  | 7.03                         |
| 7.46                  | 6.58                         |
| 10.15                 | 8.45                         |
| 7.95                  | 4.65                         |
| 7.65                  | 6.11                         |
| 8.28                  | 4.97                         |
| 8.61                  | 5.79                         |
| 8.65                  | 8.18                         |
| 7.85                  | 5.52                         |
| 7.60                  | 6.18                         |
| 7.41                  | 6.30                         |
| 7.08                  | 6.73                         |
| 6.97                  | 4.53                         |
| 8.04                  | 6.60                         |
| 8.09                  | 6.65                         |
| 9.05                  | 6.48                         |
| 9.17                  | 6.49                         |
| 7.91                  | 8.63                         |
| 7.86                  | 6.19                         |
| 6.96                  | 6.78                         |
| 6.16                  | 8.48                         |

**Table S2:** *Concentration of karmitoxin per cell*

Comparison of karmitoxin concentration in picograms per cell in cultures grown in f/2 media and fed *Rhodomonas salina* (left column) and cultures grown in ammonium substituted f/2 media (right column).

## References for Supporting Information

- Cai, Pengjie et al. 2016. "Two New Karlotoxins Found in *Karlodinium Veneficum* (Strain GM2) from the East China Sea." *Harmful Algae* 58:66–73.
- Doi, Yukiko et al. 1997. "Luteophanol A, a New Polyhydroxyl Compound from Symbiotic Marine Dinoflagellate *Amphidinium* Sp." *The Journal of Organic Chemistry* 62(12):3820–23.
- Echigoya, Reiko, Lesley Rhodes, Yasukatsu Oshima, and Masayuki Satake. 2005. "The Structures of Five New Antifungal and Hemolytic Amphidinol Analogs from *Amphidinium Carterae* Collected in New Zealand." *Harmful Algae* 4(2):383–89.
- Hanif, Novriyandi, Osamu Ohno, Makoto Kitamura, Kaoru Yamada, and Daisuke Uemura. 2010. "Symbiopolyol, a VCAM-1 Inhibitor from a Symbiotic Dinoflagellate of the Jellyfish *Mastigias Papua*." *Journal of natural products* 73(7):1318–22.
- Houdai, Toshihiro et al. 2001. "Acetate Labeling Patterns of Dinoflagellate Polyketides, Amphidinols 2, 3 and 4." *Tetrahedron* 57(26):5551–55.
- Huang, Shin-Jong, Chih-Ming Kuo, Ying-Chih Lin, Yi-Min Chen, and Chung-Kuang Lu. 2009. "Carteraol E, a Potent Polyhydroxyl Ichthyotoxin from the Dinoflagellate *Amphidinium Carterae*." *Tetrahedron Letters* 50(21):2512–15.
- Huang, Xiao Chun, Di Zhao, Yue Wei Guo, Hou Ming Wu, Li Ping Lin, et al. 2004. "Lingshuiol, a Novel Polyhydroxyl Compound with Strongly Cytotoxic Activity from the Marine Dinoflagellate *Amphidinium* Sp." *Bioorganic and Medicinal Chemistry Letters* 14(12):3117–20.
- Huang, Xiao Chun, Di Zhao, Yue Wei Guo, Hou Ming Wu, Enrico Trivellone, et al. 2004. "Lingshuiols A and B, Two New Polyhydroxy Compounds from the Chinese Marine Dinoflagellate *Amphidinium* Sp." *Tetrahedron Letters* 45(28):5501–4.
- Hwang, Buyng Su et al. 2013. "Ostreol A: A New Cytotoxic Compound Isolated from the Epiphytic Dinoflagellate *Ostreopsis Cf. Ovata* from the Coastal Waters of Jeju Island, Korea." *Bioorganic & Medicinal Chemistry Letters* 23(10):3023–27.
- Inuzuka, Toshiyasu, Kaoru Yamada, and Daisuke Uemura. 2014. "Amdigenols E and G, Long Carbon-Chain Polyol Compounds, Isolated from the Marine Dinoflagellate *Amphidinium* Sp." *Tetrahedron Letters* 55(46):6319–23.

- Inuzuka, Toshiyasu, Yutaka Yamamoto, Kaoru Yamada, and Daisuke Uemura. 2012. "Amdigenol A, a Long Carbon-Backbone Polyol Compound, Produced by the Marine Dinoflagellate *Amphidinium* Sp." *Tetrahedron Letters* 53(2):239–42.
- Kubota, Takaaki et al. 1998. "Luteophanols B and C, New Polyhydroxyl Compounds from Marine Dinoflagellate *Amphidinium* Sp." *Tetrahedron* 54(48):14455–64.
- Kubota, Takaaki, Ayako Takahashi, Masashi Tsuda, and Jun'ichi Kobayashi. 2005. "Luteophanol D, New Polyhydroxyl Metabolite from Marine Dinoflagellate *Amphidinium* Sp." *Marine Drugs* 3(4):113–18.
- Meng, Yanhui, Ryan M. Van Wagoner, Ian Misner, Carmelo Tomas, and Jeffrey L. C. Wright. 2010. "Structure and Biosynthesis of Amphidinol 17, a Hemolytic Compound from *Amphidinium Carterae*." *Journal of natural products* 73(3):409–15.
- Morsy, Nagy et al. 2005. "Isolation and Structure Elucidation of a New Amphidinol with a Truncated Polyhydroxyl Chain from *Amphidinium Klebsii*." *Tetrahedron* 61(36):8606–10.
- Morsy, Nagy et al. 2006. "Structures of New Amphidinols with Truncated Polyhydroxyl Chain and Their Membrane-Permeabilizing Activities." *Bioorganic & Medicinal Chemistry* 14(19):6548–54.
- Murata, Michio, Respati T. Swasono, Mitsunori Kanemoto, and Tohru Oishi. 2010. "Structural Reevaluations of Amphidinol 3, a Potent Antifungal Compound from Dinoflagellate." *HETEROCYCLES* 82(2):1359.
- Nuzzo, Genoveffa, Adele Cutignano, Angela Sardo, and Angelo Fontana. 2014. "Antifungal Amphidinol 18 and Its 7-Sulfate Derivative from the Marine Dinoflagellate *Amphidinium Carterae*." *Journal of Natural Products* 77(6):1524–27.
- Paul, , Gopal K., Matsumori, Nobuaki, Keiichi Konoki, Michio Murata, and Kazuo Tachibana. 1997. "Chemical Structures of Amphidinols 5 and 6 Isolated from Marine dinoflagellate *Amphidinium Klebsii* and Their Cholesterol-Dependent Membrane Disruption." *Journal of Marine Biotechnology* (September 2014).
- Paul, Gopal K., Nobuaki Matsumori, Michio Murata, and Kazuo Tachibana. 1995. "Isolation and Chemical Structure of Amphidinol 2, a Potent Hemolytic Compound from Marine Dinoflagellate *Amphidinium Klebsii*." *Tetrahedron Letters* 36(35):6279–82.
- Peng, Jiangnan, Allen R. Place, Wesley Yoshida, Clemens Anklin, and Mark T. Hamann. 2010. "Structure and Absolute Configuration of Karlotoxin-2, an Ichthyotoxin from

- the Marine Dinoflagellate *Karlodinium Veneficum*.” *Journal of the American Chemical Society* 132(10):3277–79.
- Rasmussen, Silas Anselm et al. 2017. “Karmitoxin: An Amine-Containing Polyhydroxy-Polyene Toxin from the Marine Dinoflagellate *Karlodinium Armiger*.” *Journal of Natural Products* acs.jnatprod.6b00860.
- Satake, Masayuki, Michio Murata, Takeshi Yasumoto, Tsuyoshi Fujita, and Hideo Naoki. 1991. “Amphidinol, a Polyhydroxypolyene Antifungal Agent with an Unprecedented Structure, from a Marine Dinoflagellate, *Amphidinium Klebsii*.” *Journal of the American Chemical Society* 113(26):9859–61.
- Sugahara, Kohtaro, Yoshiaki Kitamura, Michio Murata, Masayuki Satake, and Kazuo Tachibana. 2011. “Prorocentrol, a Polyoxy Linear Carbon Chain Compound Isolated from the Toxic Dinoflagellate *Prorocentrum Hoffmannianum*.” *Journal of Organic Chemistry* 76(9):3131–38.
- Van Wagoner, Ryan M. et al. 2008. “Isolation and Characterization of Karlotoxin 1, a New Amphipathic Toxin from *Karlodinium Veneficum*.” *Tetrahedron Letters* 49(45):6457–61.
- Van Wagoner, Ryan M. et al. 2010. “Structure and Relative Potency of Several Karlotoxins from *Karlodinium Veneficum*.” *Journal of Natural Products* 73(8):1360–65.
- Washida, Kazuto, Tomoyuki Koyama, Kaoru Yamada, Masaki Kita, and Daisuke Uemura. 2006. “Karatungols a and B, Two Novel Antimicrobial Polyol Compounds, from the Symbiotic Marine Dinoflagellate *Amphidinium* Sp.” *Tetrahedron Letters* 47(15):2521–25.
- Waters, Amanda L., Joonseok Oh, Allen R. Place, and Mark T. Hamann. 2015. “Stereochemical Studies of the Karlotoxin Class Using NMR Spectroscopy and DP4 Chemical-Shift Analysis: Insights into Their Mechanism of Action.” *Angewandte Chemie International Edition* 54(52):15705–10.
